# Supplementary material for: Enhanced Stem Cell Osteogenic Differentiation by Bioactive Glass Functionalized Graphene Oxide Substrates
Source: Hindawi journal article supplement (doi:10.1155/2016/5613980), 2016-01-01
Supplement: f1 [file 5613980.f1.pdf]

## Supporting Information

### Enhanced stem cell osteogenic differentiation by bioactive glass functionalized graphene oxide substrates

Xiaoju Mo<sup>1,2</sup>, Yan Wei<sup>1</sup>, Xuehui Zhang<sup>3</sup>, Qing Cai<sup>4</sup>, Yang Shen<sup>5</sup>, Xiaohan Dai<sup>6</sup>, Song Meng<sup>1</sup>, Xing Liu<sup>1</sup>, Yun Liu<sup>1</sup>, Zhewen Hu<sup>1</sup>, Xuliang Deng<sup>1,7,8</sup>

<sup>1</sup> Department of Geriatric Dentistry, Peking University School and Hospital of Stomatology, Beijing 100081, People's Republic of China

<sup>2</sup> Department of Prosthodontics, Peking University School and Hospital of Stomatology, Beijing 100081, People's Republic of China

<sup>3</sup> Department of Dental Materials, Peking University School and Hospital of Stomatology, Beijing 100081, People's Republic of China

<sup>4</sup> State Key Laboratory of Organic-Inorganic Composites, Key Laboratory of Carbon Fiber and Functional Polymers, Ministry of Education, Beijing University of Chemical Technology, Beijing 100029, PR China

<sup>5</sup> State Key Laboratory of New Ceramics and Fine Processing, and Department of Materials Science and Engineering, Tsinghua University, Beijing 100084, PR China

<sup>6</sup> Key Laboratory of Zoonosis, Ministry of Education, Institute of Zoonosis, College of Veterinary Medicine, Jilin University, Changchun 130062, People's Republic of China

<sup>7</sup> National Engineering Laboratory for Digital and Material Technology of Stomatology, Beijing 100081, People's Republic of China

<sup>8</sup> Beijing Laboratory of Biomedical Materials, Peking University School and Hospital of Stomatology, Beijing 100081, People's Republic of China

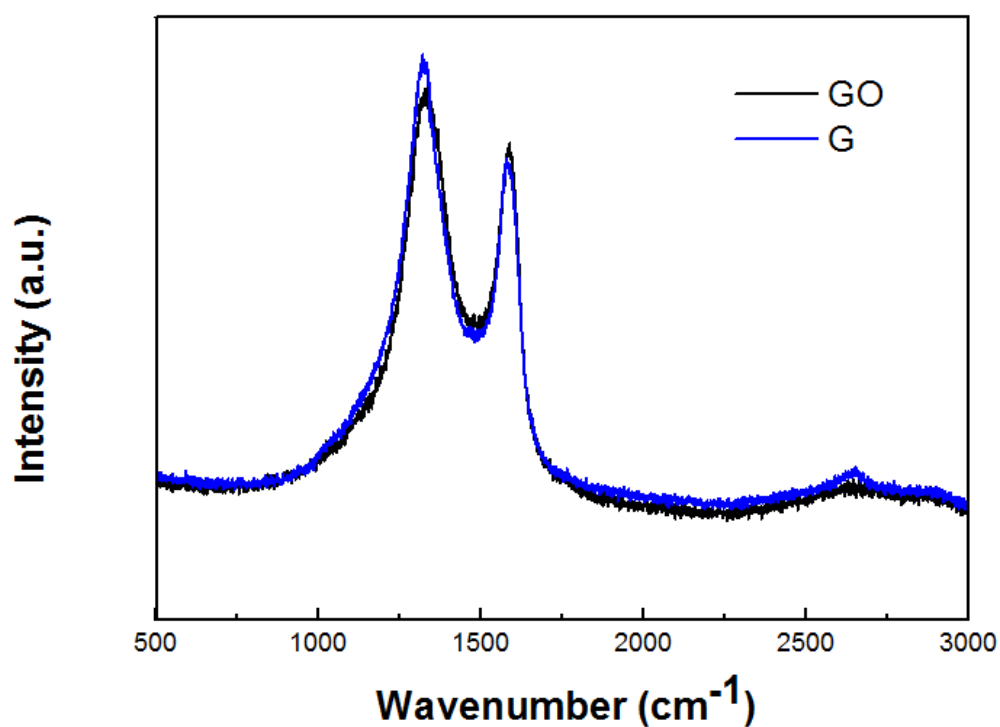

**Figure S1: Raman spectra of the GO and G.** The G band peak is related to the first order scattering of the E<sub>2g</sub> mode, the D band peak due to a breathing mode of  $\kappa$ -point phonons of A<sub>1g</sub> symmetry, existing in defected graphene, and 2D band explained by the adopted double resonant model. The intensity ratio of the D and G peak has been used as a metric of disorder in graphene. The Raman spectrum of the GO contains G and D bands (at 1586 cm<sup>-1</sup> and 1336 cm<sup>-1</sup>) and a low 2D band. The Raman spectrum of the G also contains both G and D bands (at 1578 cm<sup>-1</sup> and 1321 cm<sup>-1</sup>, respectively), however, with an increased D/G intensity ratio compared to that in GO and a peak broadening along with a tail toward the higher wavenumbers in 2D band.

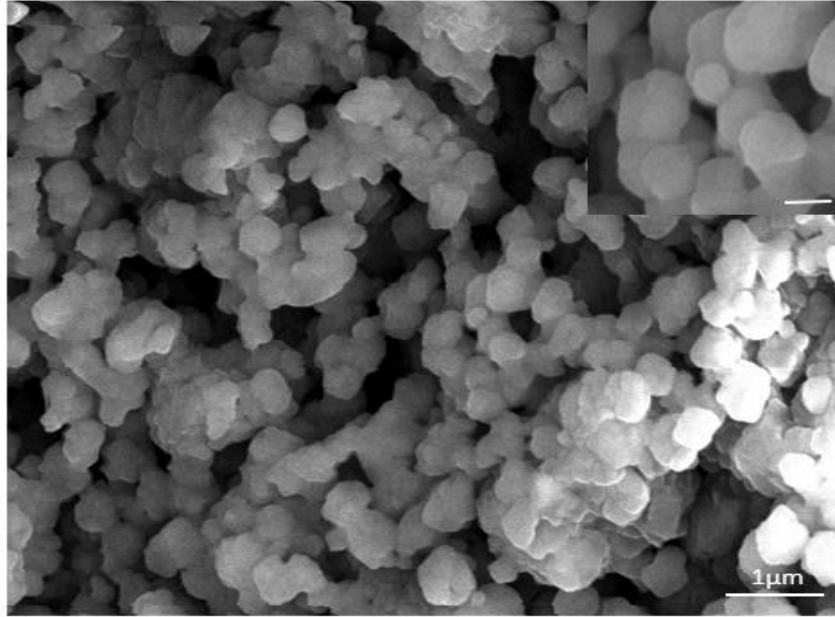

**Figure S2: SEM images of BG with 1000 °C reaction temperature.** BG particles showed a round shape with a homogeneous diameter. The insets is the magnified images showing the morphology of the bioactive glasses. Scale bars, 200 nm.
